# Supplementary material
Source: publisher site journal article supplement (https://www.dovepress.com/get_supplementary_file.php?f=479330.docx)
Supplement: Supplementary file 1 [file get_supplementary_file.php]

# **Supporting Information**

# **Curcumin-loaded nanocomposite hydrogel dressings for promoting infected wound healing and tissue regeneration**

Zhengzheng Fu1, *, Jingwen Zou1, *, Jing Zhong1, Jipang Zhan1, Lian Zhang1, Xiaoru Xie1, Lai Zhang1, 2, Wenqiang Li3, #, Renliang He1, #

1Department of Dermatologic Surgery and Dermatologic Oncology, Dermatology Hospital of Southern Medical University, Guangzhou 510000, Guangdong Province, China.

2Guangdong Pharmaceutical University, Guangzhou 510006, Guangdong Province, China.

3Engineering Technology Research Center for Sports Assistive Devices of Guangdong, Guangzhou Sport University, Guangzhou 510500, Guangdong Province, China.

*These authors contributed equally to this work and should be considered co-first authors.

#Corresponding author.

Correspondence: Department of Dermatologic Surgery and Dermatologic Oncology, Dermatology Hospital of Southern Medical University, Guangdong Provincial Dermatology Hospital, 2 Lujing Road, Yuexiu District, Guangzhou 510000, Guangdong Province, China.

E-mail: liwq@gzsport.edu.cn (Wenqiang Li) and zshrl2006@smu.edu.cn (Renliang He)

**In vitro drug release from hydrogels**

**
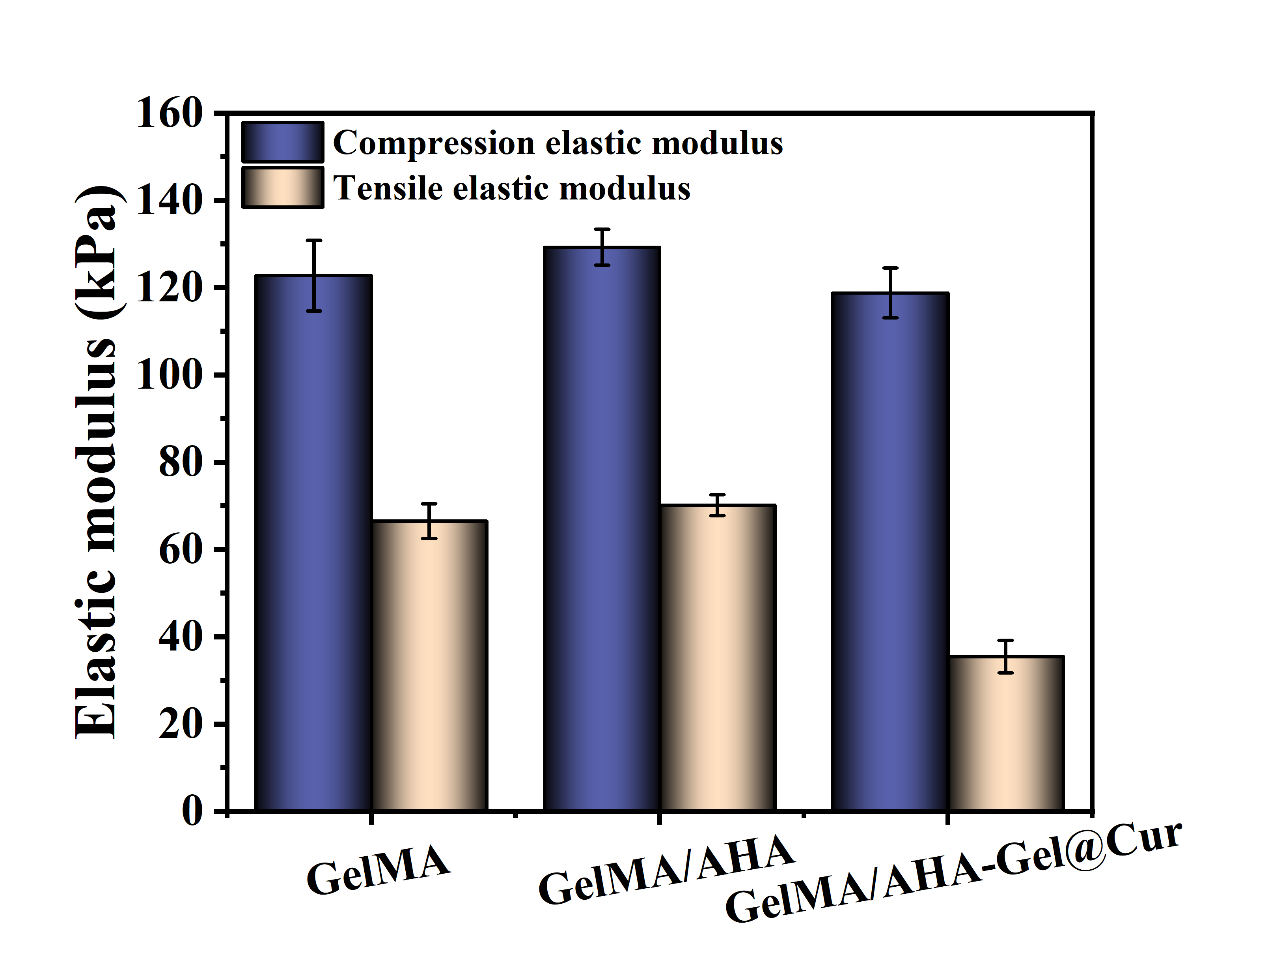
**

Fig. S1 Comparison of elastic modulus of various hydrogels.

The stress-strain curve of the hydrogel was selected to fit the linear relationship range for the calculation of elastic modulus. The quantitative results of the compressive elastic modulus and tensile elastic modulus of various hydrogels are shown in Fig. S1. It can be seen from the data in the figure that the overall elastic modulus of GelMA/AHA hydrogel obtained after the addition of AHA increases, because the aldehyde group in AHA and the formation of the residual amino Schiff base in GelMA cross-link, and the overall cross-linking density of the gel increases1. After the addition of Gel@Cur nanoparticles, the steric hindrance effect of Gel@Cur nanoparticles affected the chemical cross-linking of the hydrogel, while the nanoparticles formed non-covalent bonds with the main body of the gel, and the cross-linking density of the composite gel decreased2.


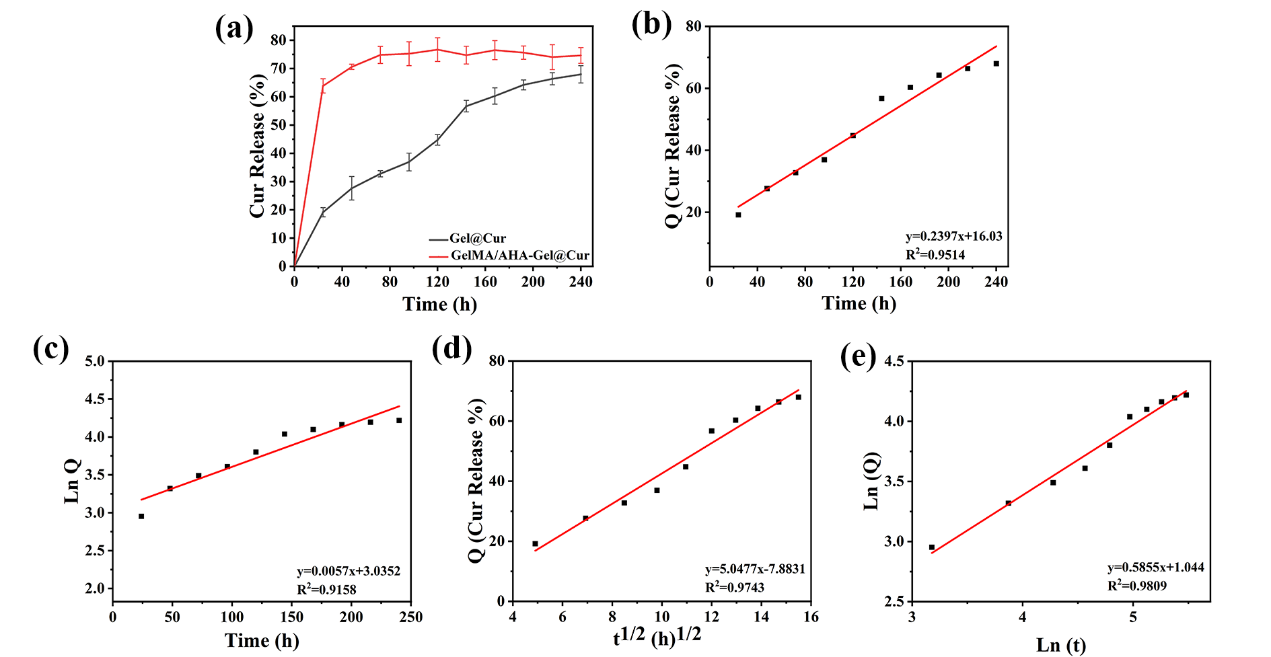


Fig. S2 (a). Curcumin release profile of hydrogels and nanoparticles *in vitro* over 240 h. (b). *In vitro* release of composite hydrogels. Zero level release simulation, (c). First step release simulation, (d). Korsmeyer-Peppas model simulation (e). Higuchi model simulation.

To further clarify the in vitro drug release mechanism of the hydrogel, the in vitro drug release time was extended to 240h. The experimental results obtained are shown in Fig. S2a. The data in the figure show that the composite hydrogel can continuously release curcumin within 240 h, and the cumulative release of drug is as high as 68%. By fitting the drug release behavior of the hydrogel within 240 h using four models, the results are shown in Fig. S2b-e. The drug release behavior of the hydrogel was more consistent with Korsmeyer-Peppas (*R*2=0.98). At the same time, the model coefficient *n* value was 0.5855 (greater than 0.45), and the drug release mechanism was determined to be the action of non-Fick diffusion mechanism and skeleton dissolution mechanism simultaneously3. As can be seen from Fig. S1b, when the drug release time reaches 120 h, there is a drug burst release phenomenon due to the dissolution of the hydrogel backbone, which is consistent with the results of our model fitting.

# **Reference**

1. Zhang L, Yang J, Ding C, et al. Application of polysaccharide-based crosslinking agents based on schiff base linkages for biomedical scaffolds. *Carbohydrate Polymers*. 2024:122585.

2. Sun Y, Zhang Y, Yu W, et al. Bio-inspired stretchable and self-healable nanocomposite gelatin hydrogel with low silica nanoparticle content and brilliant angle/strain-independent structural colors. *Chemical Engineering Journal*. 2024;496:154190.

3. Wang Z, Liu J, Zheng Y, et al. Copper Ion‐Inspired Dual Controllable Drug Release Hydrogels for Wound Management: Driven by Hydrogen Bonds. *Small*. 2024:2401152.
